# Supplementary material for: Voluntary medical male circumcision and HIV infection among men who have sex with men: Implications from a systematic review
Source: PubMed Central journal article supplement — SAGE Open Med. 2019 Aug 8;7:2050312119869110. doi: 10.1177/2050312119869110 (PMC6689924; doi:10.1177/2050312119869110), 2019-08-08
Supplement: AIM1_Supplement_Tables.pdf [file AIM1_Supplement_Tables.pdf]

**Supplement Table 1: Database searching strategies**

| Search terms | Search results                                                                                                                                                                                                                                                                                                                                                                                                                                                                                         |
|--------------|--------------------------------------------------------------------------------------------------------------------------------------------------------------------------------------------------------------------------------------------------------------------------------------------------------------------------------------------------------------------------------------------------------------------------------------------------------------------------------------------------------|
| #1           | "HIV"[Mesh] OR "HIV"[tiab] OR "HIV Infections"[Mesh] OR "HIV Antibodies"[Mesh] OR HIV-1[tiab] OR HIV1[tiab] OR HIV-2[tiab] OR HIV2[tiab] OR "HIV/AIDS"[tiab] OR "Sexually Transmitted Diseases, Viral"[Mesh:NoExp] OR "human immunodeficiency virus"[tiab] OR "human immunodeficiency virus"[tiab] OR "human immune deficiency virus"[tiab] OR "AIDS"[tiab] OR "acquired immunodeficiency syndrome"[tiab] OR "acquired immunodeficiency syndrome"[tiab] OR "acquired immune deficiency syndrome"[tiab] |
| #2           | "Circumcision, Male"[Mesh] OR "Foreskin/surgery"[MeSH] OR circumcision[tiab] OR circumsie*[tiab] OR circumcis*[tiab]                                                                                                                                                                                                                                                                                                                                                                                   |
| #3           | "Homosexuality, Male"[Mesh] OR "Bisexuality"[Mesh] OR "gay men"[tiab] OR "bisexual men"[tiab] OR (bisexual*[tiab] AND men[tiab]) OR MSM[tiab] OR "men who have sex with men"[tiab] OR "Transgendered Persons"[Mesh] OR "Transsexualism"[Mesh] OR transgender*[tiab] OR intersex*[tiab]                                                                                                                                                                                                                 |
| #4           | #1 AND #2 AND #3                                                                                                                                                                                                                                                                                                                                                                                                                                                                                       |
| #5           | Limit #4 to: Publication date from 1980/01/01                                                                                                                                                                                                                                                                                                                                                                                                                                                          |
| #6           | newspaper article[pt] OR letter[pt] OR comment[pt] OR case reports[pt] OR practice guideline[pt] OR guideline[pt] OR news[pt] OR editorial[pt] OR historical article[pt] OR legal cases[pt] OR published erratum[pt] OR congresses[pt]                                                                                                                                                                                                                                                                 |
| #7           | #5 NOT #6                                                                                                                                                                                                                                                                                                                                                                                                                                                                                              |

| Supplemental Table 2: Summary of Studies of Male circumcision status and HIV risk among MSM (ABS indicates an abstract only) |                                           |                                                           |                                                   |                                      |                                                                               |                                      |                                |                                  |                 |                                                                                                                              |
|------------------------------------------------------------------------------------------------------------------------------|-------------------------------------------|-----------------------------------------------------------|---------------------------------------------------|--------------------------------------|-------------------------------------------------------------------------------|--------------------------------------|--------------------------------|----------------------------------|-----------------|------------------------------------------------------------------------------------------------------------------------------|
| Characteristics of included studies                                                                                          |                                           |                                                           |                                                   |                                      |                                                                               |                                      | Total                          |                                  |                 |                                                                                                                              |
| Sources                                                                                                                      | Study time and Location                   | Race/ethnicity                                            | Age (yrs)                                         | Participants: analytical/full sample | HIV assessment N (%)                                                          | Circumcision assessment N (%)        | Circumcised N (%) [HIV+/circ+] | Uncircumcised N (%) [HIV+/circ-] | Study design    | Sampling strategy                                                                                                            |
| <b>Cross-sectional studies</b>                                                                                               |                                           |                                                           |                                                   |                                      |                                                                               |                                      |                                |                                  |                 |                                                                                                                              |
| <sup>10</sup> Qian, et al., 2016                                                                                             | Beijing, China, 2010-2011                 | Asian Chinese                                             | Mean=31                                           | 1155                                 | Lab: 290/1137(25.5%)                                                          | Genital exam: 79/964 (8.2%)          | 11/79 (13.9%)                  | 263/1013 (26.0%)                 | Cross-sectional | Through a local community-based organization, advertisement on a website, outreach to gay-friendly venues, snowball-sampling |
| <sup>11</sup> Crosby, et al., 2015*                                                                                          | A mid-size southern city, US, 2011        | Black                                                     | Mean=22.6 (SD=3.13)                               | 400 recruited, 85 declined;          | Lab: 106/384 (27.6%)                                                          | Self-report: 279/384 (72.7%)         | 76/279 (27.2%)                 | 30/105 (28.6%)                   | Cross-sectional | Convenience sampling from a HIV/STD clinic                                                                                   |
| <sup>17</sup> Solomon, et al., 2014(ABS)*                                                                                    | 12 cities, India, 2012-2013               | Asian Indian                                              | Median=25                                         | 12022                                | Lab: 838/12022 (7.0%)                                                         | Self-report: 1963/12022 (17%)        | 104/1963 (5.3%)                | 734/10059 (7.3%)                 | Cross-sectional | Respondent-driven sampling                                                                                                   |
| <sup>12</sup> Zeng, et al., 2014*                                                                                            | Chengdu, China, 2009                      | Asian Chinese                                             | Median=26.5 (Range 18-69)                         | 570                                  | Lab: 13.3%                                                                    | Genital examination: all MSM (18.2%) | 9/66 (13.6%)                   | 67/504 (13.3%)                   | Cross-sectional | Stratified snowball sampling                                                                                                 |
| <sup>20</sup> Doerner, et al., 2013                                                                                          | Britain, 2007-2008                        | White                                                     | Mean=36 (Range 18-75)                             | 1521                                 | Self-reported: 97/1097 (8.8%)                                                 | Self-report: 254/1521 (16.7%)        | Not reported                   | Not reported                     | Cross-sectional | Convenience sampling via website and venues (e.g., sexual health clinics, bars, clubs and others)                            |
| <sup>13</sup> Pando, et al., 2013*                                                                                           | Buenos Aires, Argentina, Nov2007-July2009 | Presumably Hispanic                                       | Mean=30.5 (SD=11.5)                               | 482/500 (96.4%)                      | Lab: 81/482 (16.8%)                                                           | Self-report: 64/482 (13.4%)          | 7/64 (10.9%)                   | 74/418 (17.8%)                   | Cross-sectional | Respondent-driven sampling via website                                                                                       |
| <sup>14</sup> Zhou, et al., 2013                                                                                             | Chongqing, China, 2010                    | Asian Chinese                                             | Median=24 (Range 18-65)                           | 491/498 (98.6%)                      | Lab: All MSM (14.9%), bottom (14.9%), top (7.1%), versatile (16.7%)           | Self-report: 88/498 (17.7%)          | Not reported                   | Not reported                     | Cross-sectional | Respondent-driven sampling via a STD clinic                                                                                  |
| <sup>18</sup> Schneider, et al., 2012                                                                                        | South India, Aug 2008-June 2009           | Asian Indian                                              | Median=26 (Range 24-30)                           | 387                                  | Lab: 72/387(18.6%)                                                            | Self-report: 143/387 (36.9%)         | 16/143 (11.2%)                 | 56/188 (29.8%)                   | Cross-sectional | Convenience sampling from drop-in centers                                                                                    |
| <sup>22</sup> Oster, et al., 2011                                                                                            | 21 cities, US, 2008                       | White (61%), Black (39%)                                  | White: Median=36, Black: Median=28                | 5855                                 | Lab: White 561/3585 (45.6%), Black 619/2270 (27.3%), Overall 1180/5855(20.2%) | Self-report: 4270/5181 (82.4%)       | 401/4270 (9.4%)                | 107/911 (11.0%)                  | Cross-sectional | Venue-based, time-space sampling                                                                                             |
| <sup>25</sup> Thornton, et al., 2011                                                                                         | London, UK, 2008                          | Ethnic minority (17%)                                     | Median=39, (Range 20-87)                          | 653 /689 (94.8%)                     | Self-reported: 152/653(23.4%)                                                 | Self-reported: 188/653 (28.8%)       | 35/188 (18.6%)                 | 117/465 (25.2%)                  | Cross-sectional | Venue-based convenience sampling                                                                                             |
| <sup>23</sup> Jozkowski, et al., 2010                                                                                        | US, 2009                                  | Black (4%), White (82.1%), Hispanic (7.4%), Asian (2.9%), | 25159 (18-23yr: 14.2%, 24-29:17.6%, 30-39: 22.9%, | 25159/26257 (95.8%)                  | Lab: 14.1%                                                                    | Self-reported: 21,312 (82.1%)        | 3012/21312 (14.3%)             | 543/3847 (14.3%)                 | Cross-sectional | Convenience sampling via email recruitment                                                                                   |

|                                             |                                                        |                                                                             |                                                                                      |                   |                                                                               |                                                                                            |                   |                 |                 |                                                   |
|---------------------------------------------|--------------------------------------------------------|-----------------------------------------------------------------------------|--------------------------------------------------------------------------------------|-------------------|-------------------------------------------------------------------------------|--------------------------------------------------------------------------------------------|-------------------|-----------------|-----------------|---------------------------------------------------|
|                                             |                                                        | Others (3.1%)                                                               | 40-49: 27.7%,<br>50-59: 13.2%,<br>60+: 3.4%)                                         |                   |                                                                               |                                                                                            |                   |                 |                 |                                                   |
| <sup>40</sup> Lane, et al., 2011            | Soweto, South Africa, 2008                             | Black African                                                               | 64% are younger than 24                                                              | 363/387 (93.8%)   | Lab:<br>69/363 (20.6%)                                                        | Self-report:<br>124/363 (33.6%)                                                            | Not reported      | Not reported    | Cross-sectional | Respondent-driven sampling                        |
| <sup>41</sup> McDaid, et al., 2010          | Glasgow and Edinburgh, Scotland, 2008                  | White                                                                       | Not reported                                                                         | 1405/1508 (93.2%) | Lab:<br>54/1405 (4.5%)                                                        | Self-report:<br>233/1405 (16.6%)                                                           | 8/233 (4.2%)      | 46/1172 (4.6%)  | Cross-sectional | Convenience sampling at gay venues                |
| <sup>36</sup> Begley, et al., 2008          | 7 cities, US, 2006                                     | White (55.9%),<br>Black (25.4%),<br>Hispanic (5.5%),<br>Others (13.2%)      | Median=32,<br>60% are older than 25                                                  | 780/1050 (74.3%)  | Self-report:<br>100/772 (13%)                                                 | Self-report<br>646/772 (84%)                                                               | 81/646 (13%)      | 19/126 (15%)    | Cross-sectional | Convenience sampling via gay pride events         |
| <sup>27</sup> Calzavara, et al, 2007(ABS)   | Ontario, Canada, 2001-2005                             | Native American (2%),<br>Latino (4%),<br>Others (9%),<br>White (85%)        | Not reported                                                                         | 165               | Not reported                                                                  | Self-report<br>11/15 (73%)                                                                 | 2/11 (18%)        | 2/4 (50%)       | Cross-sectional | Convenience sampling                              |
| <sup>8</sup> Millett et al, 2007-Latino     | 3 cities, US, May 2005-Apr 2006                        | Latino (49%)                                                                | Median=33.1                                                                          | 957/1091 (87.7%)  | Lab:<br>348/957 (36%)                                                         | Self-report:<br>317/957 (33%)                                                              | 116/317 (37%)     | 232/640 (36%)   | Cross-sectional | Respondent-driving sampling                       |
| <sup>8</sup> Millett, et al., 2007-Black    | 3 cities, US, May 2005-Apr 2006                        | Black (51%)                                                                 | Median=42.5                                                                          | 1079/1154 (93.5%) | Lab:<br>563/1154 (52%)                                                        | Self-report:<br>794/1079 (74%)                                                             | 425/794 (54%)     | 138/285 (48%)   | Cross-sectional | Respondent-driving sampling                       |
| <sup>42</sup> Mor, et al., 2007             | San Francisco, US, Jan1996-Dec 2005                    | White (66%),<br>Latino (16%),<br>Asian/PI (10%),<br>Black (7%),<br>1% Other | Not reported                                                                         | 20 832            | Lab:<br>14902 (72%)                                                           | Genital exam:<br>15207/20832 (73%)                                                         | 8942/12 577 (71%) | 5960/8255 (72%) | Cross-sectional | Electronic medical records review                 |
| <sup>44</sup> Reisen, et al.,2007           | New York City, US                                      | Latino (146 from Brazil, 169 from Colombia, 167 from Dominican Republic)    | Brazil:<br>Mean=37.5;<br>Colombia:<br>Mean=38.2;<br>Dominican Republic:<br>Mean=33.6 | 427/482 (88.6%)   | Self-report:<br>Brazilian (22.6%),<br>Colombian (32.0%),<br>Dominican (25.2%) | Self-report:<br>All (25%)<br>Brazilian (20.6%),<br>Colombian (26.6%),<br>Dominican (25.8%) | 28/111 (25.3%)    | 101/336 (30.1%) | Cross-sectional | Convenience sampling                              |
| <sup>31,32</sup> Sanchez, et al., 2007;2009 | 3 cities in Peru, 1 city in Ecuador, Feb 2006-Jun 2006 | Presumably Hispanic                                                         | Mean=26.4 (SD=6.7)                                                                   | 2884              | Lab:<br>314 (11%)                                                             | Genital exam:<br>123/2884 (4%)                                                             | 13/123 (1%)       | 301/2761 (11%)  | Cross-sectional | Snowball sampling from Minister of Health clinics |
| <sup>28</sup> Lai, et al., 2004 (ABS)       | Taipei, Taiwan, 2003                                   | Presumably Asian Chinese                                                    | Not reported                                                                         | 556               | Lab:<br>33/556 (6%)                                                           | Self-report:<br>154/556 (28%)                                                              | 5/154 (3%)        | 28/402 (7%)     | Cross-sectional | Not reported                                      |
| <sup>29</sup> Kumta, et al., 2002 (ABS)     | Mumbai, India, Mar 2001-Jul 2002                       | Presumable Asian Indian                                                     | Not reported                                                                         | 122               | Lab:<br>21/122 (17%)                                                          | Genital exam:<br>27/122 (22%)                                                              | 2/27 (7%)         | 19/95 (20%)     | Cross-sectional | Not reported                                      |

|                                                                                   |                                                               |                                                                        |                                                                                     |                                                                  |                                                                                                            |                                                                              |                   |                  |                                                       |                                                                                   |
|-----------------------------------------------------------------------------------|---------------------------------------------------------------|------------------------------------------------------------------------|-------------------------------------------------------------------------------------|------------------------------------------------------------------|------------------------------------------------------------------------------------------------------------|------------------------------------------------------------------------------|-------------------|------------------|-------------------------------------------------------|-----------------------------------------------------------------------------------|
| <sup>45</sup> Tabet, et al., 2002                                                 | Lima, Peru, 1996                                              | Presumable Hispanic                                                    | Mean=24                                                                             | 440/451 (97.6%)                                                  | Lab:<br>82/444 (18.5%)                                                                                     | Genital exam:<br>36/440 (8%)                                                 | Not reported      | Not reported     | Cross-sectional                                       | Convenience sampling via street-outreach                                          |
| <sup>43</sup> Reid, et al., 2001                                                  | England and Wales, 2001                                       | White (93%), Asian (3%), Mixed (2%), Black (1%)                        | Mean=32.8 (SD=10.5)                                                                 | 13 851/14 616 (94.8%)                                            | Self-report:<br>726 /13851(5%)                                                                             | Self-report:<br>3089/13 851 (22%)                                            | 188/3089 (6%)     | 538/762 (5%)     | Cross-sectional                                       | Convenience sampling via gay-focused event, booklets, and website                 |
| <sup>39</sup> Kreiss & Hopkins, 1993                                              | Seattle, US, Apr 1989-1991                                    | White (90%), Black (4%), Latino (4%), Asian/PI (1%)                    | UMC:<br>Mean=40.6,<br>MC:<br>Mean=34.5                                              | 499/502 (99.4%)                                                  | Lab:<br>313/499 (63%)                                                                                      | Self-report:<br>422/499 (85%)                                                | 254/422 (60%)     | 59/77 (77%)      | Cross-sectional                                       | Convenience sampling via AIDS clinics                                             |
| <b>Studies with follow-up</b>                                                     |                                                               |                                                                        |                                                                                     |                                                                  |                                                                                                            |                                                                              |                   |                  |                                                       |                                                                                   |
| <sup>19</sup> Koblin, et al., 2013                                                | 6 cities, US, 2009-2010                                       | Black                                                                  | HIV-negative:<br>Mean=37                                                            | 1164 at baseline, 935 at 6m, 872 at 12m                          | Lab:<br>28/1162 (2.4%)                                                                                     | Combination of genital exam and self-report:<br>881/ 1162 (75.8%)            | 21/881(2.4%)      | 7/281 (2.5%)     | Cohort study with follow-up at 6m and 12m             | Convenience sampling at gay community and via sex networkers; part of the HPTN061 |
| <sup>16</sup> Chen, et al., 2011*                                                 | Taiwan, 2001-2005                                             | Asian Chinese                                                          | mean=32.4, sd=8.1, range 17-81                                                      | 1093                                                             | Lab:<br>-all MSM (7.4%),<br>-2001 (3.4%),<br>-2002 (5.1%),<br>-2003 (8.9%),<br>-2004(8.5),<br>-2005 (8.3%) | Self-reported:<br>266/1024 (26.0%)                                           | 13/266 (4.9%)     | 66/758 (8.7%)    | Follow-up at 6m for HIV-neg MSM for 4 years           | Convenience sampling; recruit from VCT programs via 5 gay-oriented-saunas         |
| <sup>21</sup> Sanchez, et al., 2011                                               | US and Peru, 2003-2007                                        | Presumably Hispanic and White                                          | US: MC:<br>Mean=30,<br>UMC:<br>Mean=27;<br>Peru: MC:<br>Mean=41,<br>UMC:<br>Mean=37 | 1822/1824 (99.9%):<br>1360 (74.6%) from Peru, 462(25.4%) from US | Lab:<br>83/1822 (4.6%)                                                                                     | Genital exam:<br>All MSM:<br>457/1822(25.7%),<br>US (81.8%),<br>Peru (5.8%), | 18/457 (3.9%)     | 67/1365 (4.9%)   | Follow up for 18m at every 3m                         | Part of a RCT for HSV-2 suppression for HIV prevention (HPTN039)                  |
| <sup>37</sup> Gust, et al., 2010                                                  | 57 cities in US; 3 cities in Canada; 1 city in Netherlands    | White (86%), Hispanic (6%), Black (4%), Asian (2%), Other (2%)         | UMC=36.9,<br>MC=36.6                                                                | 4889/5417 (90.3%)                                                | Lab:<br>342/488 (7.0%)                                                                                     | Self-report:<br>4209/4889 (86.1%)                                            | 299/4209 (7.1%)   | 43/680 (6.3%)    | Follow up for 36m at every 6m                         | Part of a RCT for HIV vaccine                                                     |
| <sup>38</sup> Jameson, et al., 2010                                               | US, Oct 2001-May 2006                                         | Whites (75%), Hispanic (8%), Black (6%), Asian/PI (5.4%), Other (4.8%) | 75.7% older than 25 years                                                           | 3828/4749 (80.6%)                                                | Lab:<br>1142/6924 (16.5%)                                                                                  | Genital exam :<br>3241/3828 (85%)                                            | 1016/5843 (17.4%) | 181/1081 (16.7%) | Follow-up with 1-6 visits                             | Convenience sampling via STD clinics                                              |
| <sup>15,24,30</sup> Buchbinder, 2007; Koblin et al., 2012; Barnabas, et al., 2011 | North America, Caribbean, South America, Australia, 2004-2007 | Black (10%), Latino (10%), Multiracial (25%), White (50%), Other (6%)  | Median=30 (Range 18-45)                                                             | 1787/1836 (97.3%)                                                | Lab:<br>80 (5%)                                                                                            | Combination of self-report and genital exam:<br>999/ 1787 (56%)              | 52/999 (5%)       | 28/788 (4%)      | Follow up at 12,30 and 52 w, and every 26w afterwards | Double-blind randomized selection (STEP study)                                    |

|                                                             |                                                 |                                                                             |                         |                    |                                     |                                                             |               |              |                                             |                                                               |
|-------------------------------------------------------------|-------------------------------------------------|-----------------------------------------------------------------------------|-------------------------|--------------------|-------------------------------------|-------------------------------------------------------------|---------------|--------------|---------------------------------------------|---------------------------------------------------------------|
| <sup>33,34</sup> Templeton, et al., 2009; Mao, et al., 2008 | Sydney, Australia, 2001-2004                    | Anglo ethnicity (74%)                                                       | Median=35 (Range 18-75) | 1426/ 1427 (99.9%) | Lab: 42 (3%)<br>0.8/100 pyr         | Combination of self-report and genital exam: 938/1426 (66%) | 29/938 (3%)   | 13/488 (3%)  | Follow-up for 36m at every 6m; cohort study | Convenience sampling from community-based venues (HIM study); |
| <sup>35</sup> Bartholow, et al., 2006                       | US, Canada, Netherlands<br>Jun 1998-<br>Nov1999 | Asian/PI (2%),<br>Other (2%),<br>Black (4%),<br>Latino (6%),<br>White (86%) | Not reported            | 5090/5095 (99.9%)  | Lab: 2.8/100 pyr ,<br>362/5095 (7%) | Self-report: 4381/5090 (86)                                 | 315/4381 (7%) | 47/709 (7%)  | Follow-up for 36m                           | Part of a RCT                                                 |
| <sup>49</sup> Buchbinder, et al., 2005                      | 6 cities, US,<br>Apr 1995-<br>May 1997          | White (76%),<br>Latino (12%),<br>Black (7%),<br>Asian/PI (5%)               | 65.4% are older than 35 | 3257               | Lab: 1.55/100 pyr                   | Self-report: 2866/3257 (88%)                                | Not reported  | Not reported | Follow-up for 18m at every 6m               | Recruit from HIVNET program                                   |

**Notes:**

ABS: abstract; MC: male is circumcised; UMC: uncircumcised ; RCT: Randomized Control Trials; HPTN: The HIV Prevention Trials Network; VCT: Voluntary Counselling and Testing ;

HSV-2: Herpes simplex virus type 2; PI: Pacific Islander

\*crude odds ratios were calculated by raw data
